# Supplementary material
Source: Springer Nature journal article supplement (https://www.springermedizin.de/resource/supplementary/12885_2012_3585_MOESM4_ESM.pdf/9463988)

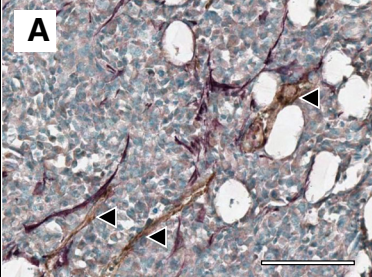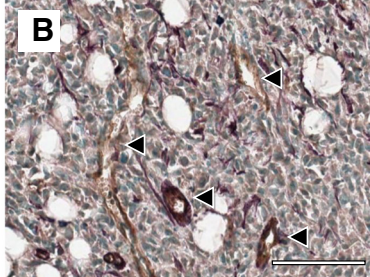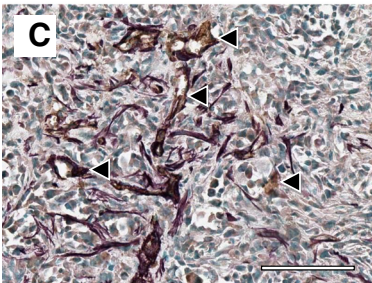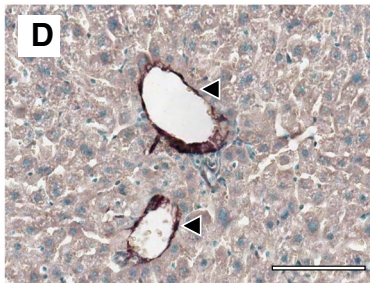

Supplement: MOESM4 [file 9463988]
